# Supplementary material for: Spatial variability of northern Iberian rainfall stable isotope values: Investigating climatic controls on daily and monthly timescales
Source: Copernicus journal article supplement (doi:10.5194/acp-2020-861), 2020-09-08
Supplement: Supplementary file 1 [file acp-2020-861-supplement.zip]

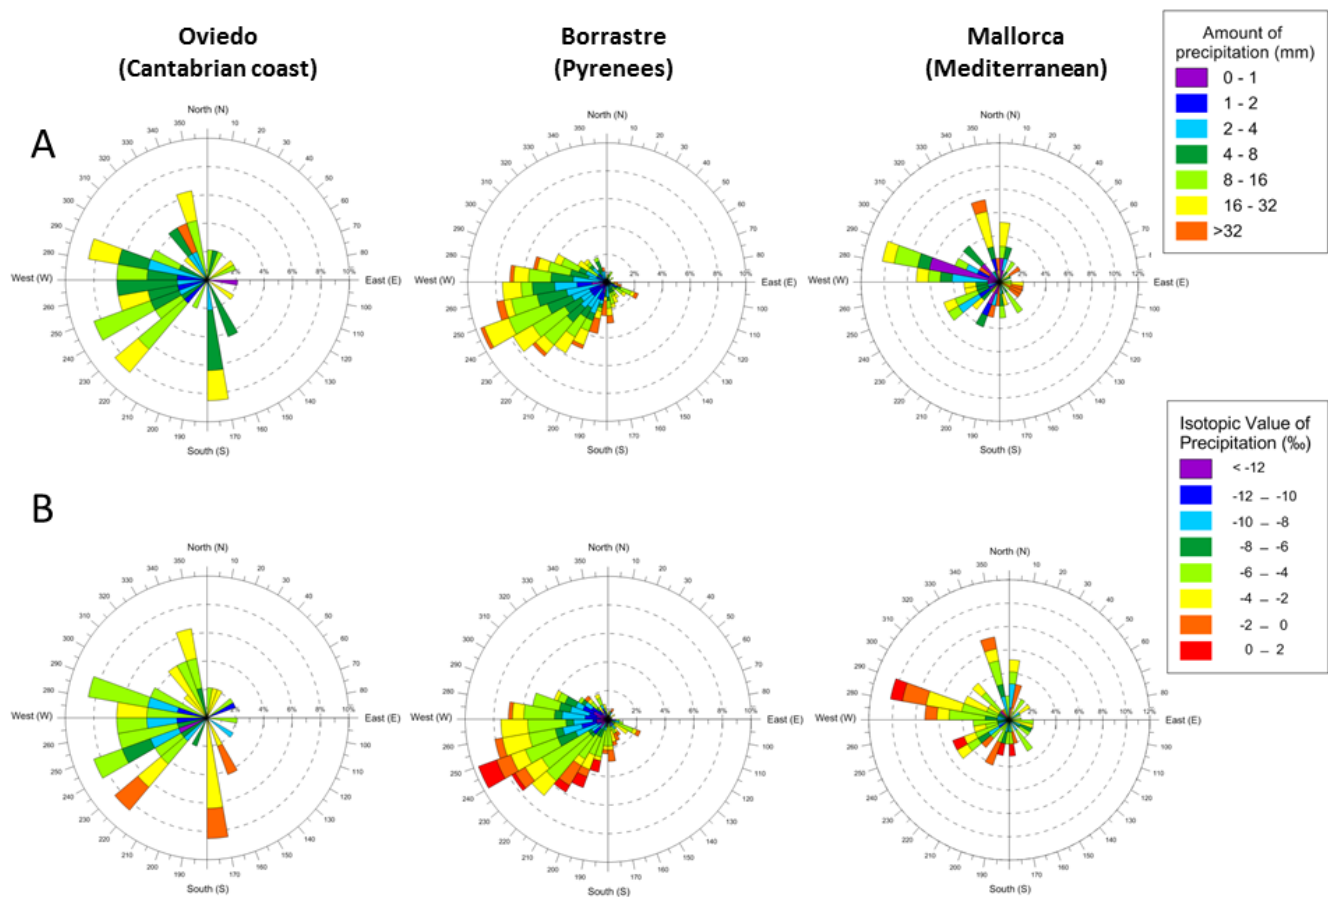

760 **Figure S1.** Wind roses represent the averaged back trajectories of air masses that produced precipitation at three stations in  
 765 northern Iberia: Oviedo (northern Spain), Borrastre (central Pyrenees) and Mallorca (Balearic Islands). Trajectories shown were  
 770 computed for only 24 hours.
